# Supplementary material for: Protocol for a randomised clinical trial of multimodal postconcussion symptom treatment and recovery: the Concussion Essentials study
Source: HighWire-hosted journal article supplement (doi:10.1136/bmjopen-2020-041458), 2021-02-01
Supplement: bmjopen-2020-041458supp002_data_supplement.pdf [file bmjopen-2020-041458supp002_data_supplement.pdf]

## Supplementary Material 1

### 10 key clinical questions in the PCSI+

1. Develops symptoms with exercise (e.g., headache, nausea, dizziness), travel or in crowded places
2. Has difficulty shifting vision in the classroom (i.e., looking from work on desk to whiteboard)
3. Neck pain at rest or during movement
4. Doesn't have enough energy to do sports or exercise or play with friends
5. So tired it is hard for child to pay attention (reading, doing homework, other)
6. Difficulty falling asleep or staying asleep at night
7. Worried or anxious and/or tearful
8. Lost appetite
9. Has difficulty keeping track of things in mind
10. Slower thinking
